# Supplementary material for: Controlling interactions between peptide-heme and G-quadruplex DNA using Fe-bound NH 3 and H 2 O ligands
Source: Royal Society of Chemistry journal article supplement (doi:10.1039/d5qi02103k), 2025-11-27
Supplement: d5qi02103k1.pdf [file d5qi02103k1.pdf]

## Supplementary Information

# Controlling interactions between peptide-heme and G-quadruplex DNA using Fe-bound NH<sub>3</sub> and H<sub>2</sub>O ligands

Jing Liu, Jinyang Feng, Ze Sun, Chang Xin, and Hulin Tai\*

\* taihulin@ybu.edu.cn

### Table of Contents

|                   |                                                                                                                                                           |        |
|-------------------|-----------------------------------------------------------------------------------------------------------------------------------------------------------|--------|
| <b>Figure S1</b>  | Molecular structures of MP11 and AcMP11 .....                                                                                                             | p. S2  |
| <b>Figure S2</b>  | Schematic representation of [d(TTAGGG)] <sub>4</sub> .....                                                                                                | p. S3  |
| <b>Figure S3</b>  | <sup>1</sup> H NMR spectra of free-G4 and Peptide-Heme(Fe <sup>3+/2+</sup> )-NH <sub>3</sub> /G4 hybrid complex .....                                     | p. S4  |
| <b>Figure S4</b>  | Heme side chain proton signal assignment of the Peptide-Heme(Fe <sup>3+</sup> )-NH <sub>3</sub> /G4 hybrid complex .....                                  | p. S5  |
| <b>Figure S5</b>  | TOCSY connectivity of heme protons of the Peptide-Heme(Fe <sup>3+</sup> )-NH <sub>3</sub> /G4 hybrid complex .....                                        | p. S6  |
| <b>Figure S6</b>  | DNA base proton signal assignment of the Peptide-Heme(Fe <sup>3+</sup> )-NH <sub>3</sub> /G4 hybrid complex .....                                         | p. S7  |
| <b>Figure S7</b>  | DNA ribose proton signal assignment of the Peptide-Heme(Fe <sup>3+</sup> )-NH <sub>3</sub> /G4 hybrid complex .....                                       | p. S8  |
| <b>Figure S8</b>  | TOCSY connectivity of ribose protons of the Peptide-Heme(Fe <sup>3+</sup> )-NH <sub>3</sub> /G4 hybrid complex .....                                      | p. S9  |
| <b>Table S1</b>   | Chemical shifts of the Peptide-Heme(Fe <sup>3+</sup> )-NH <sub>3</sub> /G4 hybrid complex .....                                                           | p. S10 |
| <b>Table S2</b>   | Chemical shifts of the Peptide-Heme(Fe <sup>2+</sup> )-NH <sub>3</sub> /G4 hybrid complex .....                                                           | p. S10 |
| <b>Figure S9</b>  | NH <sub>4</sub> Cl-dependent Vis absorption spectra (470-720 nm) of the Peptide-Heme(Fe <sup>3+</sup> )-H <sub>2</sub> O/G4 hybrid complex at 25 °C ..... | p. S11 |
| <b>Figure S10</b> | NH <sub>4</sub> Cl-dependent absorption spectra of Peptide-Heme(Fe <sup>3+</sup> )-H <sub>2</sub> O/G4 hybrid complex at 15–35 °C .....                   | p. S12 |
| <b>Figure S11</b> | NH <sub>4</sub> Cl-dependent absorption spectra of Peptide-Heme(Fe <sup>3+</sup> )-H <sub>2</sub> O at 15–35 °C .....                                     | p. S13 |
| <b>Table S3</b>   | Ammonia substitute constant ( <i>K<sub>s</sub></i> ) .....                                                                                                | p. S14 |
| <b>Figure S12</b> | G4-dependent absorption spectra of Peptide-Heme(Fe <sup>3+</sup> )-NH <sub>3</sub> at 15–35 °C .....                                                      | p. S15 |
| <b>Figure S13</b> | G4-dependent absorption spectra of Peptide-Heme(Fe <sup>3+</sup> )-H <sub>2</sub> O at 15–35 °C .....                                                     | p. S16 |
| <b>Table S4</b>   | Binding constant ( <i>K<sub>a</sub></i> ) of complexation reaction .....                                                                                  | p. S17 |
| <b>Figure S14</b> | Temperature-dependent CD spectra .....                                                                                                                    | p. S18 |
| <b>Figure S15</b> | pH-dependent absorption spectra .....                                                                                                                     | p. S19 |
| <b>Table S5</b>   | The <i>pK<sub>obs</sub></i> values of NH <sub>4</sub> <sup>+</sup> in aqueous solution .....                                                              | p. S20 |

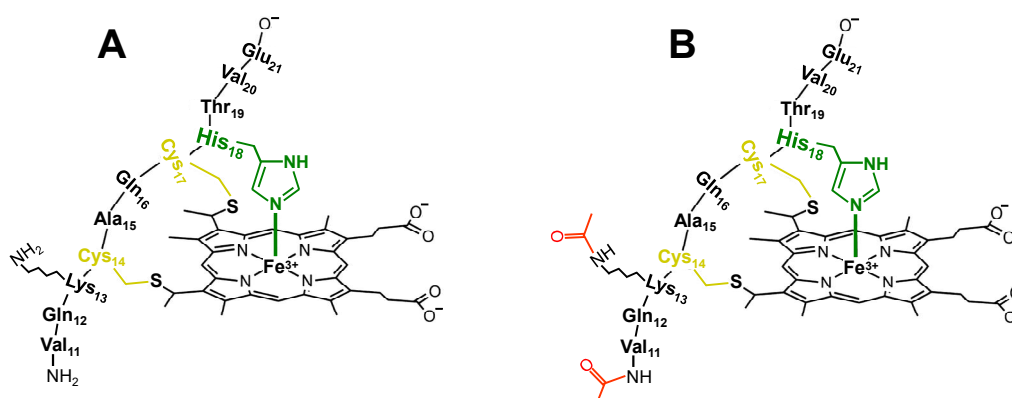

**Figure S1** Molecular structures of the MP11 (A) and AcMP11 (B).

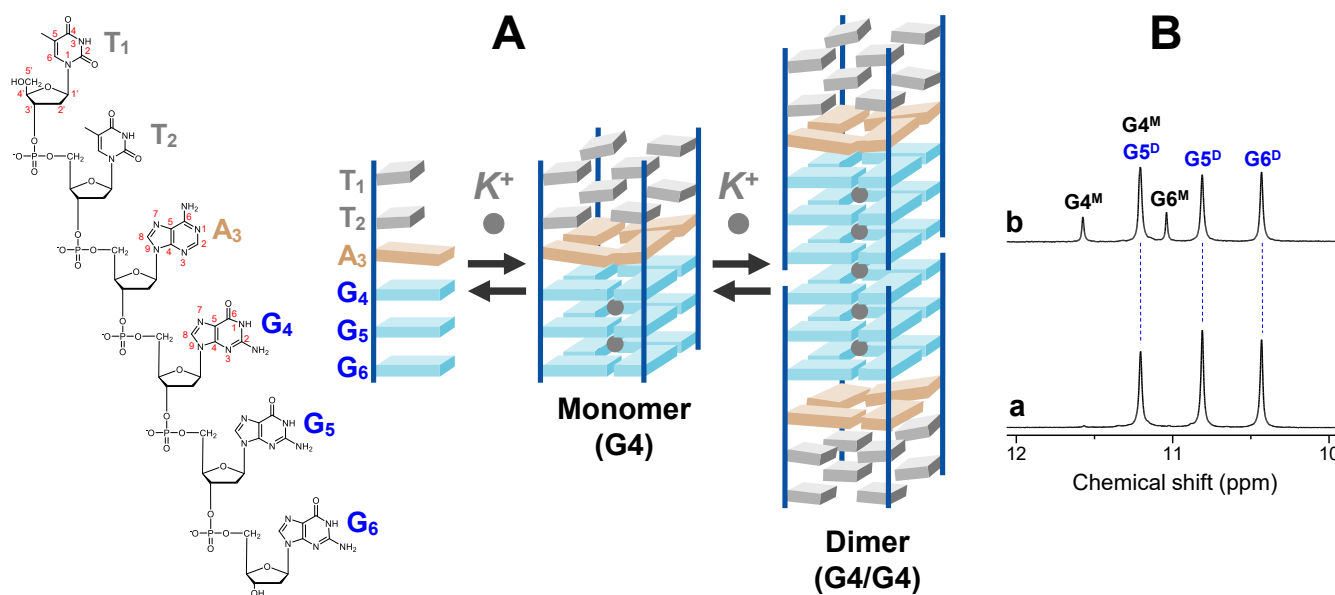

**Figure S2** (A) Schematic representation of a parallel G-quadruplex DNA ([d(TTAGGG)]<sub>4</sub>) formed from d(TTAGGG). (B) Downfield-shifted portions of the <sup>1</sup>H NMR spectra of the [d(TTAGGG)]<sub>4</sub> in 90% H<sub>2</sub>O/10% D<sub>2</sub>O, 50 mM potassium phosphate buffer (pH 7.00, 25°C), with (a) and without (b) 300 mM KCl.

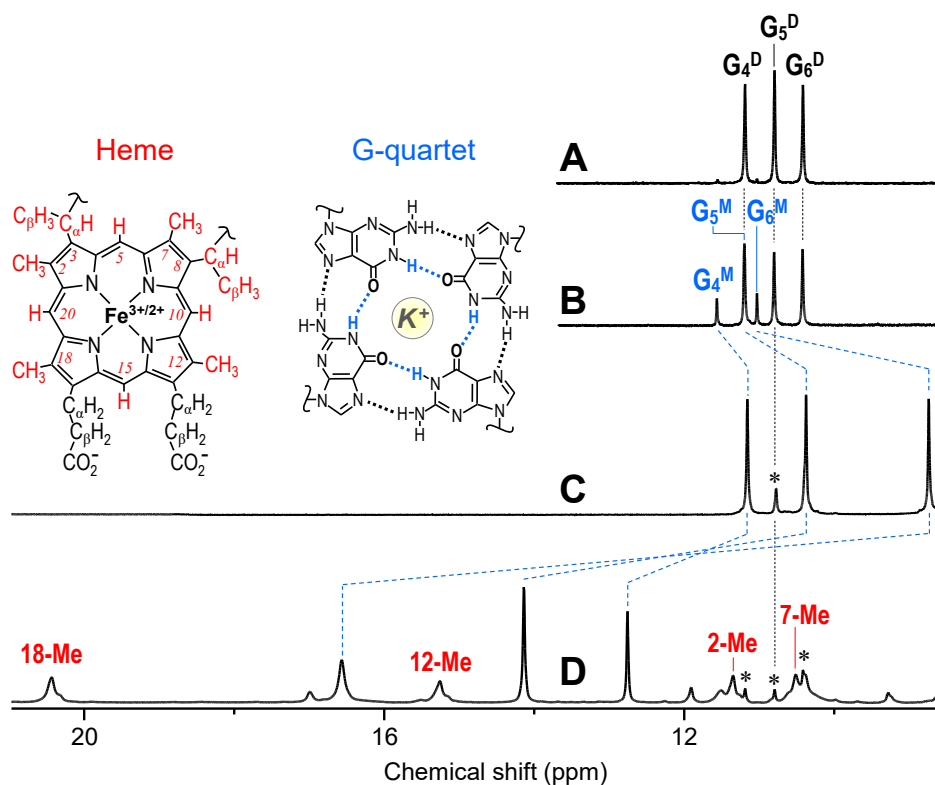

**Figure S3** Down-shifted portions of the  $^1\text{H}$  NMR spectra of  $[\text{d}(\text{T TAGGG})]_4$  (A and B), reduced Peptide-Heme( $\text{Fe}^{2+}$ )- $\text{NH}_3/\text{G4}$  hybrid complex (C), and oxidized Peptide-Heme( $\text{Fe}^{3+}$ )- $\text{NH}_3/\text{G4}$  hybrid complex (D) in 90%  $\text{H}_2\text{O}/10\%$   $\text{D}_2\text{O}$ , 50 mM potassium phosphate buffer (pH 7.0 and 25  $^\circ\text{C}$ ), and with (A, C, D) and without (B) of 300 mM KCl. The reduced and oxidized Peptide-Heme( $\text{Fe}^{2+/3+}$ )- $\text{NH}_3/\text{G4}$  hybrid complex (C and D) were prepared in 150 mM  $\text{NH}_4\text{Cl}$  with and without of 150 equivalents  $\text{Na}_2\text{S}_2\text{O}_4$ .  $\text{G}_n^{\text{D}}$  and  $\text{G}_n^{\text{M}}$ , where  $n = 4, 5, 6$ , represent the dimer and monomer of the DNA. The molecular structures of *c*-type heme and G-quartet are shown in the upper left corner. The guanine imino proton signals of the free DNA and complexes are connected by broken lines. Peaks denoted asterisks in spectra C and D are due to the dimer DNA remaining in the samples.

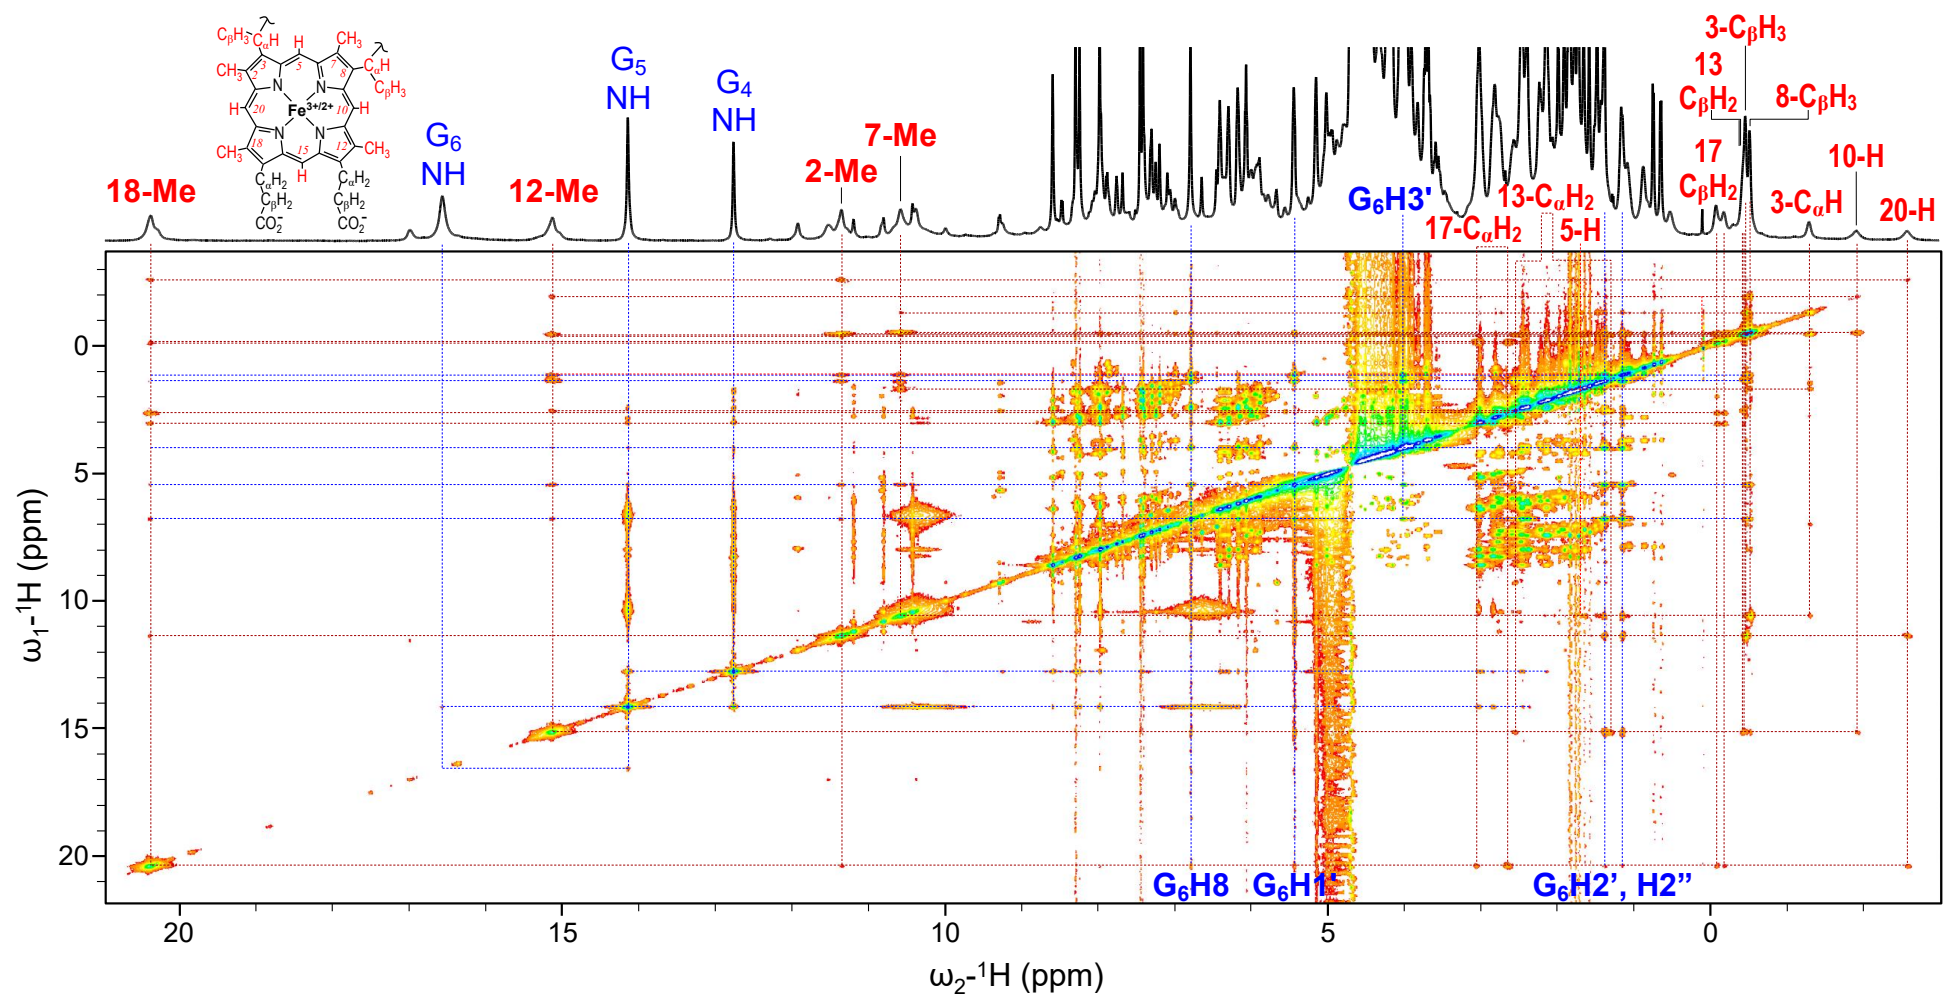

**Figure S4** NOESY spectrum of the oxidized Peptide-Heme( $\text{Fe}^{3+}$ )- $\text{NH}_3$ /G4 hybrid complex in 90%  $\text{H}_2\text{O}$ /10%  $\text{D}_2\text{O}$ , 150 mM  $\text{NH}_4\text{Cl}$ , 300 mM  $\text{KCl}$ , and 50 mM potassium phosphate buffer (pH 7.00, 25°C). A mixing time of 200 ms was used to record the spectrum. Assignments of heme side chain proton signals are shown. Assignments of DNA base proton signals are shown in Figures S5-S8.

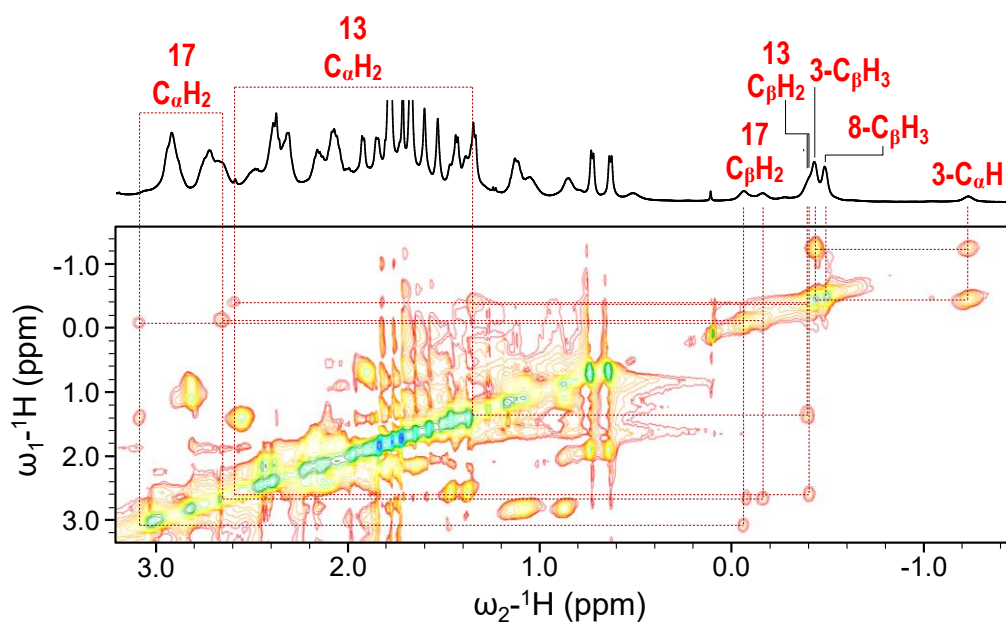

**Figure S5** Portion of the TOCSY spectrum of the oxidized Peptide-Heme( $\text{Fe}^{3+}$ )- $\text{NH}_3$ /G4 hybrid complex in 90%  $\text{H}_2\text{O}$ /10%  $\text{D}_2\text{O}$ , 150 mM  $\text{NH}_4\text{Cl}$ , 300 mM  $\text{KCl}$ , and 50 mM potassium phosphate buffer (pH 7.00, 25°C). A mixing time of 80 ms was used to record the spectrum. Assignments of selected proton signals are shown.

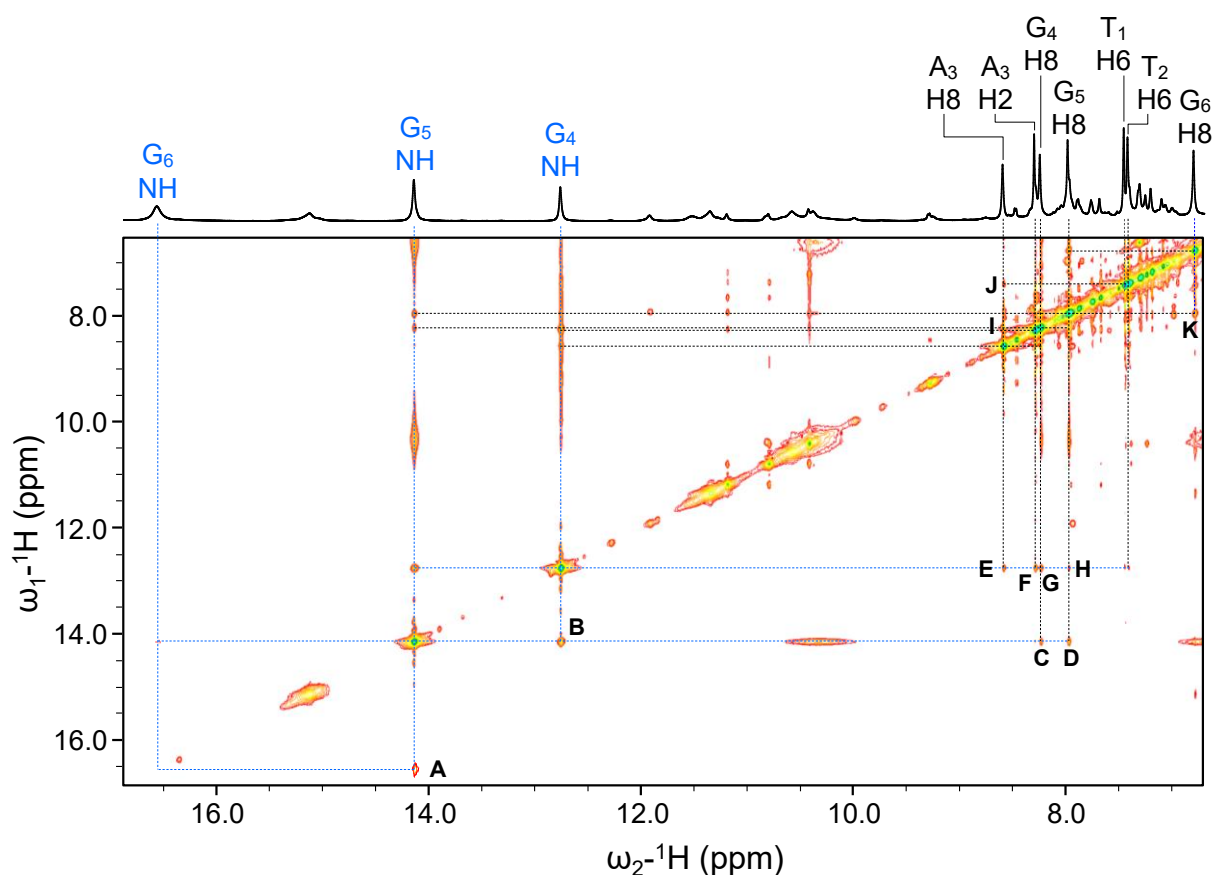

**Figure S6** Portion of the NOESY spectrum of the oxidized Peptide-Heme( $\text{Fe}^{3+}$ )- $\text{NH}_3/\text{G4}$  hybrid complex in 90%  $\text{H}_2\text{O}/10\%$   $\text{D}_2\text{O}$ , 150 mM  $\text{NH}_4\text{Cl}$ , 300 mM  $\text{KCl}$ , and 50 mM potassium phosphate buffer (pH 7.00, 25°C). A mixing time of 200 ms was used to record the spectrum. Cross peaks A–K indicate the NOE connectivities of the following proton pairs: (A)  $\text{G}_6\text{NH}-\text{G}_5\text{NH}$ ; (B)  $\text{G}_5\text{NH}-\text{G}_4\text{NH}$ ; (C)  $\text{G}_5\text{NH}-\text{G}_4\text{H8}$ ; (D)  $\text{G}_5\text{NH}-\text{G}_5\text{H8}$ ; (E)  $\text{G}_4\text{NH}-\text{A}_3\text{H8}$ ; (F)  $\text{G}_4\text{NH}-\text{A}_3\text{H2}$ ; (G)  $\text{G}_4\text{NH}-\text{G}_4\text{H8}$ ; (H)  $\text{G}_4\text{NH}-\text{G}_5\text{H8}$ ; (I)  $\text{A}_3\text{H8}-\text{G}_4\text{H8}$ ; (J)  $\text{A}_3\text{H8}-\text{T}_2\text{H6}$ ; (K)  $\text{G}_5\text{H8}-\text{G}_6\text{H8}$ . Assignments of DNA base proton signals are shown.

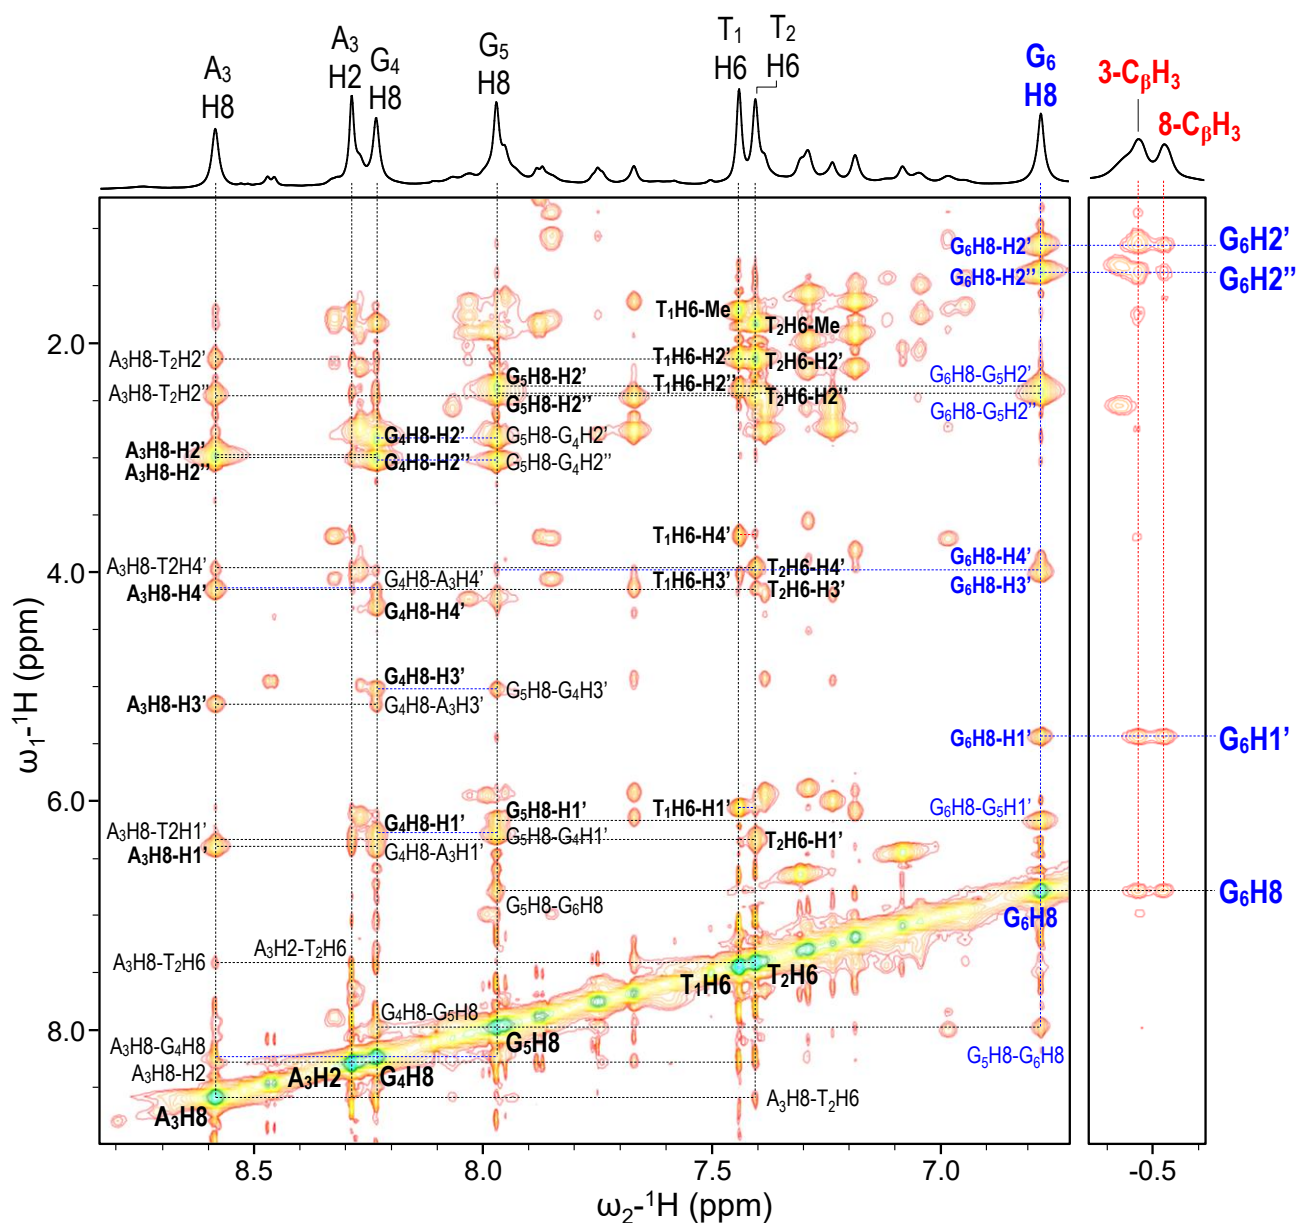

**Figure S7** Portions of the NOESY spectrum of the oxidized Peptide-Heme( $\text{Fe}^{3+}$ )- $\text{NH}_3$ /G4 hybrid complex in 90%  $\text{H}_2\text{O}$ /10%  $\text{D}_2\text{O}$ , 150 mM  $\text{NH}_4\text{Cl}$ , 300 mM  $\text{KCl}$ , and 50 mM potassium phosphate buffer (pH 7.00, 25°C). A mixing time of 200 ms was used to record the spectrum. Intramolecular NOE connectivities between base and ribose proton signals are shown in the left portion. Intermolecular NOE connectivities between heme side chain ( $3\text{-C}_\beta\text{H}_3$  and  $8\text{-C}_\beta\text{H}_3$ ) and G6-quartet (H8, H1', H2', and H2'') proton signals are shown in the right portion.



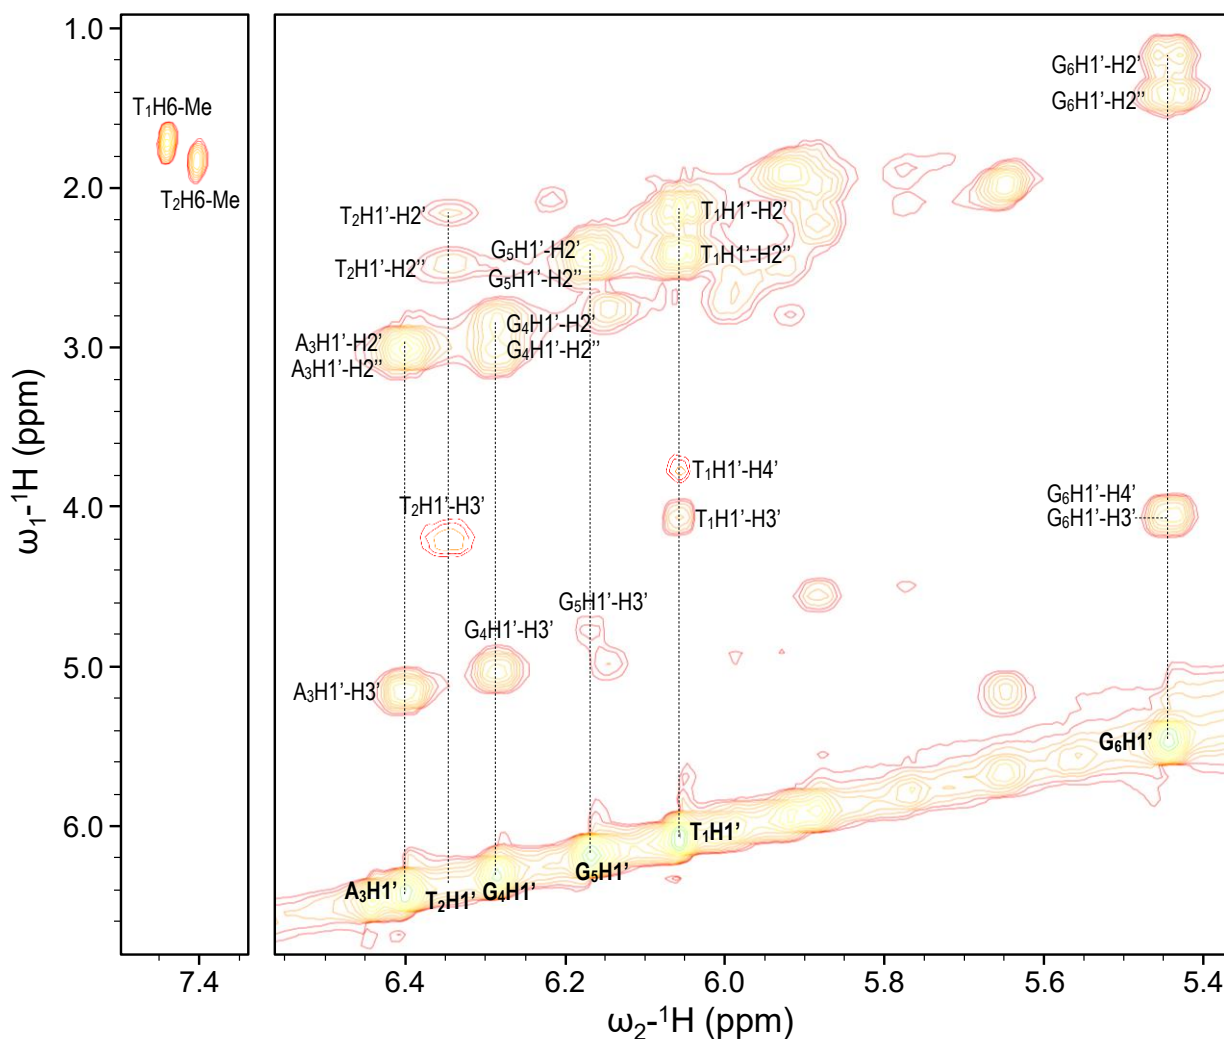

**Figure S8** Portions of the TOCSY spectrum of the oxidized Peptide-Heme( $\text{Fe}^{3+}$ )- $\text{NH}_3$ /G4 hybrid complex in 90%  $\text{H}_2\text{O}$ /10%  $\text{D}_2\text{O}$ , 150 mM  $\text{NH}_4\text{Cl}$ , 300 mM  $\text{KCl}$ , and 50 mM potassium phosphate buffer (pH 7.00, 25°C). A mixing time of 80 ms was used to record the spectrum. Assignments of selected base (thymine ( $T_1$  and  $T_2$ ), left portion) and ribose (right portion) proton signals are shown.

## Supplementary Information

**Table S1** Chemical shifts of the oxidized Peptide-Heme( $\text{Fe}^{3+}$ )- $\text{NH}_3/\text{G4}$  hybrid complex in 90%  $\text{H}_2\text{O}/10\%$   $\text{D}_2\text{O}$ , 150 mM  $\text{NH}_4\text{Cl}$ , 300 mM  $\text{KCl}$ , and 50 mM potassium phosphate buffer (pH 7.00, 25°C).

| <b>DNA</b>           | <b>Base protons</b> |          | <b>Ribose protons</b> |            |      |                   |
|----------------------|---------------------|----------|-----------------------|------------|------|-------------------|
|                      | NH, Me, or H2       | H6 or H8 | H1'                   | H2'/H2''   | H3'  | H4'               |
| <b>T<sub>1</sub></b> | 1.72                | 7.44     | 6.06                  | 2.13, 2.39 | 4.03 | 3.67              |
| <b>T<sub>2</sub></b> | 1.84                | 7.41     | 6.34                  | 2.14, 2.45 | 4.14 | 3.97              |
| <b>A<sub>3</sub></b> | 8.29                | 8.59     | 6.40                  | 2.97, 3.02 | 5.14 | 4.17              |
| <b>G<sub>4</sub></b> | 12.75               | 8.23     | 6.29                  | 2.84, 3.01 | 5.01 | 4.31              |
| <b>G<sub>5</sub></b> | 14.14               | 7.97     | 6.17                  | 2.39, 2.40 | 4.24 | n.d. <sup>a</sup> |
| <b>G<sub>6</sub></b> | 16.56               | 6.78     | 5.43                  | 1.15, 1.38 | 4.03 | 3.99              |

---

| <b>Hemin</b> | <b>Methyl protons</b> |       |       |       | <b>Thioether groups</b>              |                                                  |                                      |                                                  | <b>Meso protons</b> |       |                   |       |
|--------------|-----------------------|-------|-------|-------|--------------------------------------|--------------------------------------------------|--------------------------------------|--------------------------------------------------|---------------------|-------|-------------------|-------|
|              | 18-Me                 | 12-Me | 7-Me  | 2-Me  | 3-C <sub><math>\alpha</math></sub> H | 3-C <sub><math>\beta</math></sub> H <sub>3</sub> | 8-C <sub><math>\alpha</math></sub> H | 8-C <sub><math>\beta</math></sub> H <sub>3</sub> | 5-H                 | 10-H  | 15-H              | 20-H  |
|              | 20.37                 | 15.12 | 10.58 | 11.34 | -1.30                                | -0.47                                            | n.d. <sup>a</sup>                    | -0.53                                            | 1.69                | -1.92 | n.d. <sup>a</sup> | -2.58 |

<sup>a</sup> Not determined.

**Table S2** Chemical shifts of the reduced Peptide-Heme( $\text{Fe}^{2+}$ )- $\text{NH}_3/\text{G4}$  hybrid complex in 90%  $\text{H}_2\text{O}/10\%$   $\text{D}_2\text{O}$ , 150 mM  $\text{NH}_4\text{Cl}$ , 300 mM  $\text{KCl}$ , and 50 mM potassium phosphate buffer (pH 7.0, 25°C).

| <b>DNA</b>           | <b>Base protons</b> |          |
|----------------------|---------------------|----------|
|                      | NH, Me, or H2       | H6 or H8 |
| <b>T<sub>1</sub></b> | 1.59                | 7.30     |
| <b>T<sub>2</sub></b> | 1.64                | 7.20     |
| <b>A<sub>3</sub></b> | 7.97                | 8.28     |
| <b>G<sub>4</sub></b> | 11.18               | 7.71     |
| <b>G<sub>5</sub></b> | 10.40               | 7.55     |
| <b>G<sub>6</sub></b> | 8.77                | 7.99     |

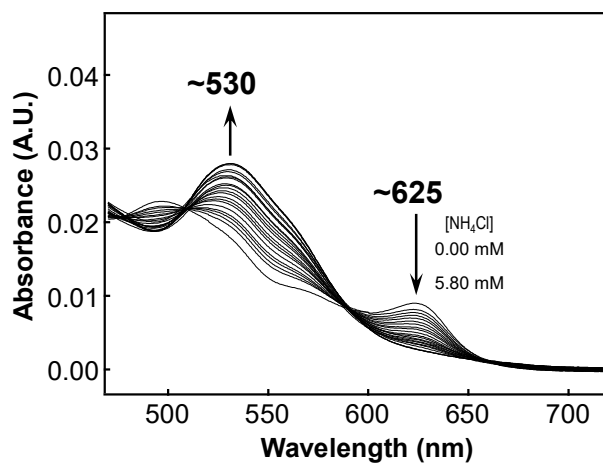

**Figure S9** Absorption spectra (470–720 nm) of Peptide-Heme( $\text{Fe}^{3+}$ )- $\text{H}_2\text{O}$ /G4 hybrid complex in the presence of various concentrations of  $\text{NH}_4\text{Cl}$ , in 300 mM KCl and 500 mM Tris-HCl buffer (pH 8.50 at 25 °C) containing 0.08 w/v% TritonX-100 and 0.5 v/v% dimethyl sulfoxide. For sample preparation of the Peptide-Heme( $\text{Fe}^{3+}$ )- $\text{H}_2\text{O}$ /G4 hybrid-complex, 400  $\mu\text{L}$  of 6  $\mu\text{M}$  Peptide-Heme- $\text{H}_2\text{O}$  was mixed with 400  $\mu\text{L}$  of 30  $\mu\text{M}$   $[\text{d}(\text{TTAGGG})]_4$ .

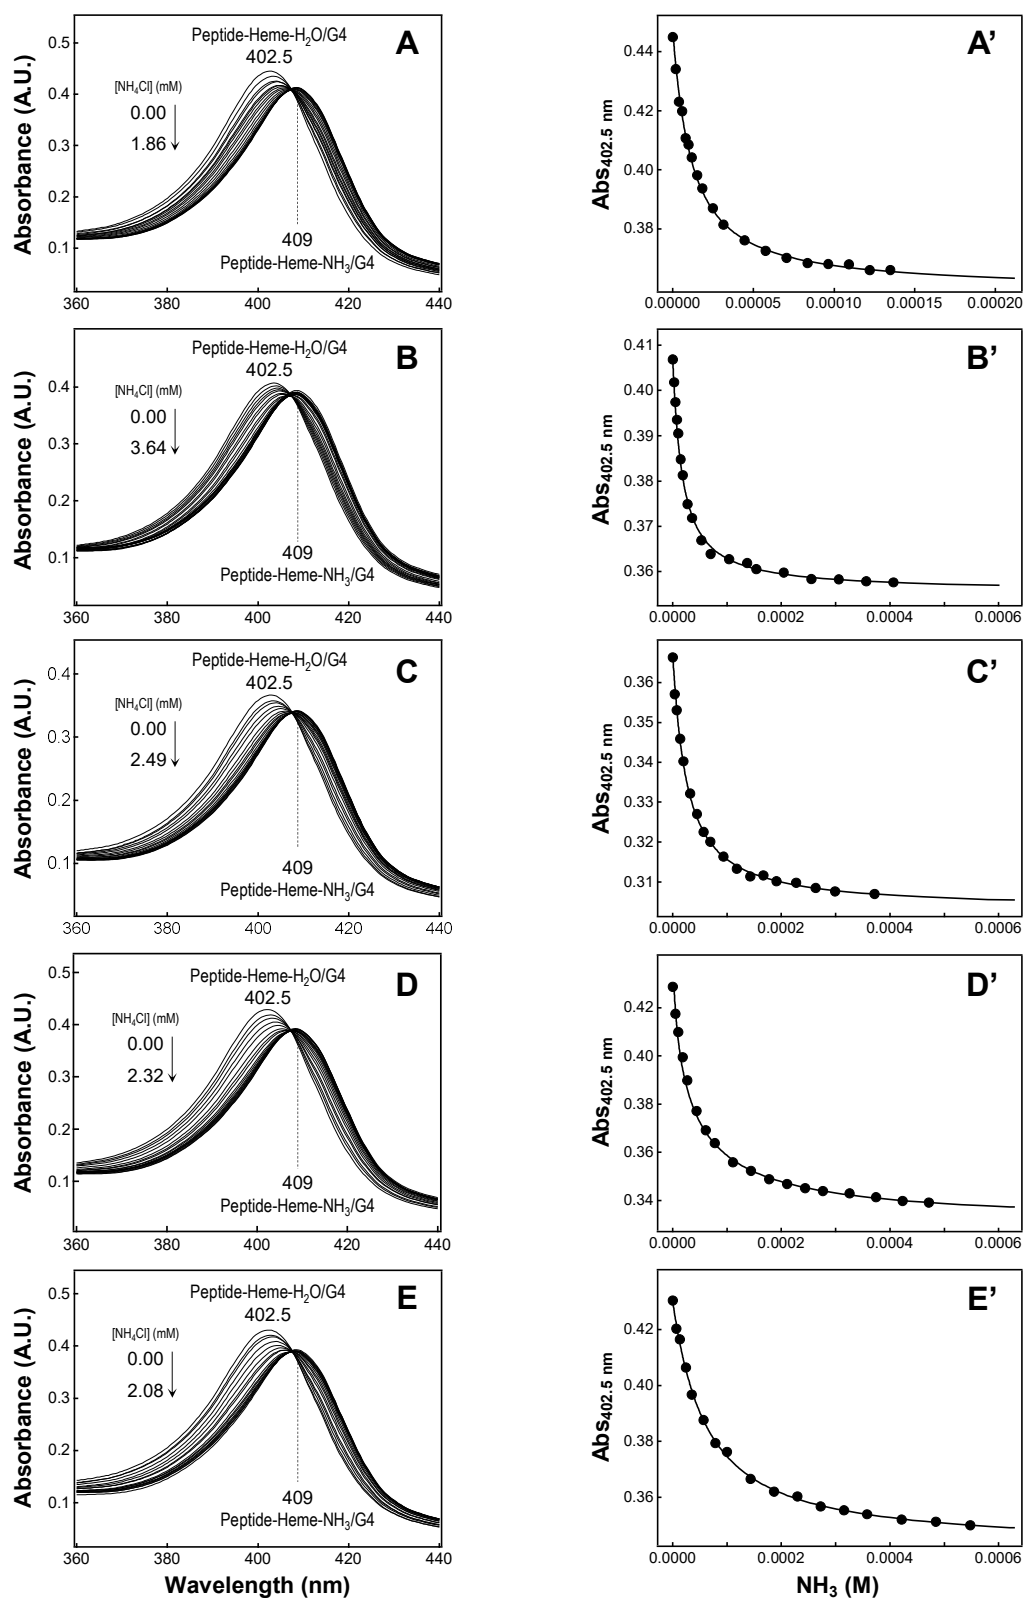

**Figure S10** (A-E) Absorption spectra (360–440 nm) of Peptide-Heme( $\text{Fe}^{3+}$ )- $\text{H}_2\text{O}/\text{G4}$  hybrid complex in the presence of various concentrations of  $\text{NH}_4\text{Cl}$ , in 300 mM KCl and 500 mM Tris-HCl buffer (pH 8.50 at 15–35 °C) containing 0.08 w/v% TritonX-100 and 0.5 v/v% dimethyl sulfoxide. (A'-E') A plot of the 402.5 nm absorbance against  $\text{NH}_3$  concentration. (A and A') 15 °C, [Peptide-Heme] = 3.6  $\mu\text{M}$ , [G4] = 16.5  $\mu\text{M}$ ; (B and B') 20 °C, [Peptide-Heme] = 3.3  $\mu\text{M}$ , [G4] = 13.8  $\mu\text{M}$ ; (C and C') 25 °C, [Peptide-Heme] = 3.0  $\mu\text{M}$ , [G4] = 12.5  $\mu\text{M}$ ; (D and D') 30 °C, [Peptide-Heme] = 3.5  $\mu\text{M}$ , [G4] = 10.5  $\mu\text{M}$ ; (E and E') 35 °C, [Peptide-Heme] = 3.5  $\mu\text{M}$ , [G4] = 10.5  $\mu\text{M}$ .

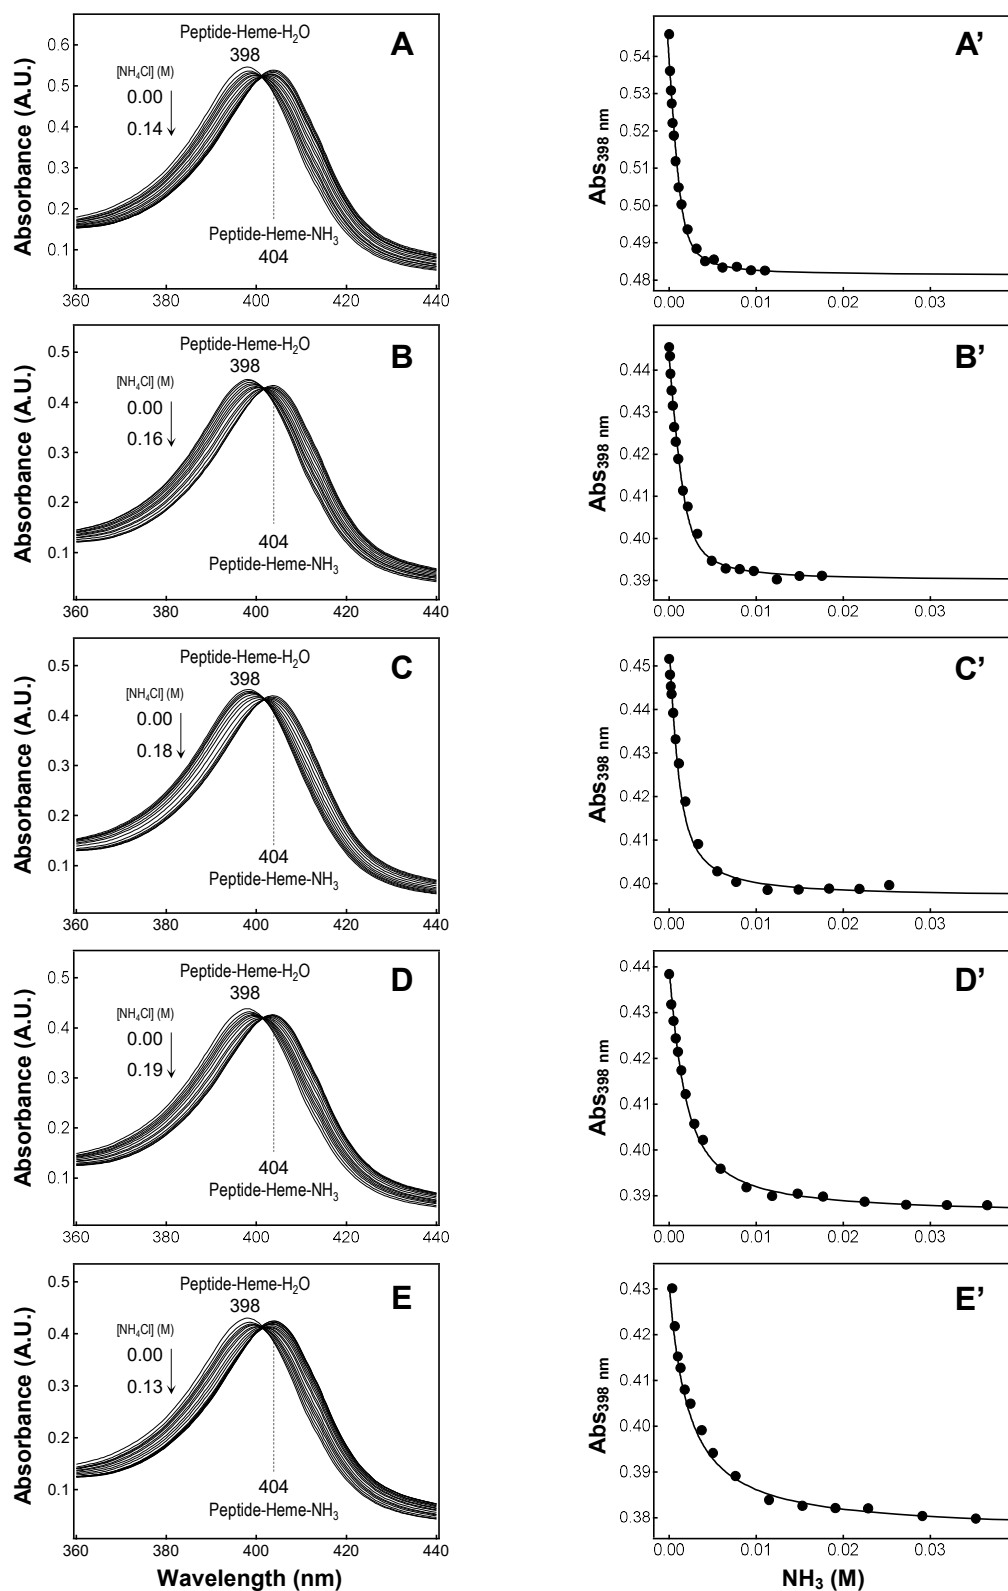

**Figure S11** (A-E) Absorption spectra (360–440 nm) of Peptide-Heme( $\text{Fe}^{3+}$ )- $\text{H}_2\text{O}$  in the presence of various concentrations of  $\text{NH}_4\text{Cl}$ , in 300 mM KCl and 500 mM Tris-HCl buffer (pH 8.50 at 15–35 °C) containing 0.08 w/v% TritonX-100 and 0.5 v/v% dimethyl sulfoxide. (A'-E') A plot of the 398 nm absorbance against  $\text{NH}_3$  concentration. (A and A') 15 °C, [Peptide-Heme] = 4.2  $\mu\text{M}$ ; (B and B') 20 °C [Peptide-Heme] = 3.4  $\mu\text{M}$ ; (C and C') 25 °C, [Peptide-Heme] = 3.5  $\mu\text{M}$ ; (D and D') 30 °C, [Peptide-Heme] = 3.4  $\mu\text{M}$ ; (E and E') 35 °C, [Peptide-Heme] = 3.3  $\mu\text{M}$ .

**Table S3** NH<sub>3</sub> binding constants ( $K_s$ ) for ligand substitution reaction.

| Temperature<br>(°C) | $K_s$ (M <sup>-1</sup> ) |                 |
|---------------------|--------------------------|-----------------|
|                     | Peptide-Heme             | Peptide-Heme/G4 |
| 15                  | 4438 ± 164               | 98733 ± 7141    |
| 20                  | 2706 ± 159               | 61221 ± 2011    |
| 25                  | 1606 ± 303               | 41227 ± 1368    |
| 30                  | 825 ± 41                 | 27873 ± 2084    |
| 35                  | 528 ± 42                 | 18357 ± 284     |

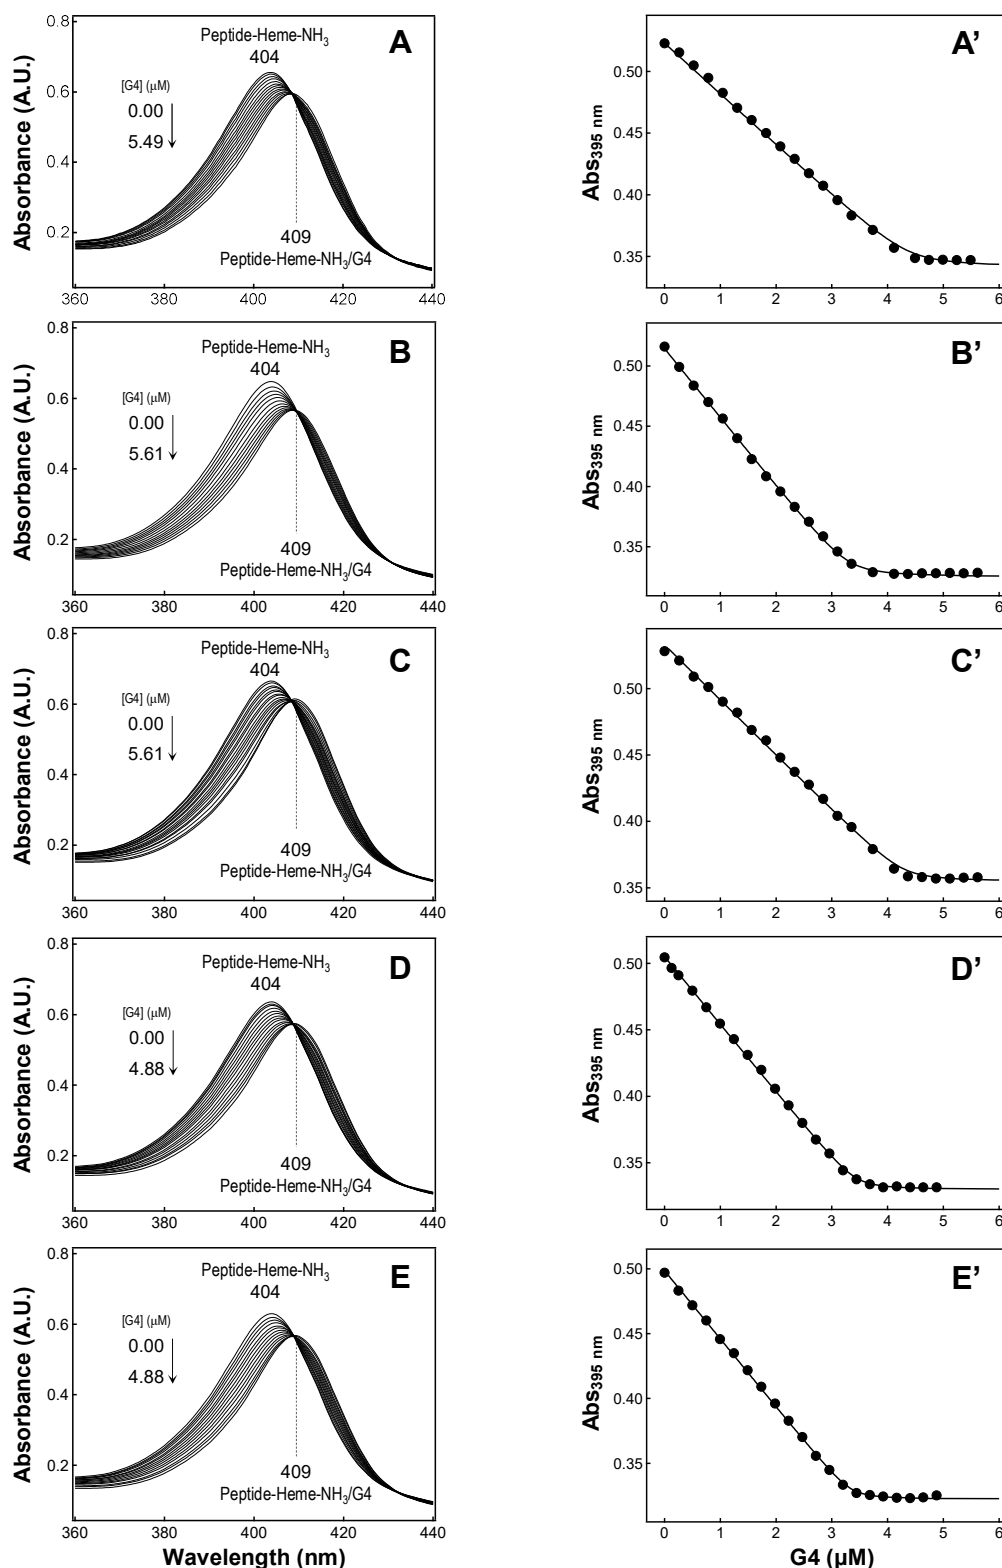

**Figure S12** (A-E) Absorption spectra (360–440 nm) of Peptide-Heme(Fe<sup>3+</sup>)-NH<sub>3</sub> in the presence of various concentrations of [d(TTAGGG)]<sub>4</sub>, in 100–180 mM NH<sub>4</sub>Cl, 300 mM KCl, and 500 mM Tris-HCl buffer (pH 8.50 at 15–35 °C) containing 0.08 w/v% TritonX-100 and 0.5 v/v% dimethyl sulfoxide. (A'-E') A plot of the 395 nm absorbance against [d(TTAGGG)]<sub>4</sub> concentration. (A and A') 15 °C, [Peptide-Heme] = 5 μM, [NH<sub>4</sub>Cl] = 100 mM; (B and B') 20 °C, [Peptide-Heme] = 5 μM, [NH<sub>4</sub>Cl] = 100 mM; (C and C') 25 °C, [Peptide-Heme] = 5 μM, [NH<sub>4</sub>Cl] = 100 mM; (D and D') 30 °C, [Peptide-Heme] = 5 μM, [NH<sub>4</sub>Cl] = 150 mM; (E and E') 35 °C, [Peptide-Heme] = 5 μM, [NH<sub>4</sub>Cl] = 180 mM.

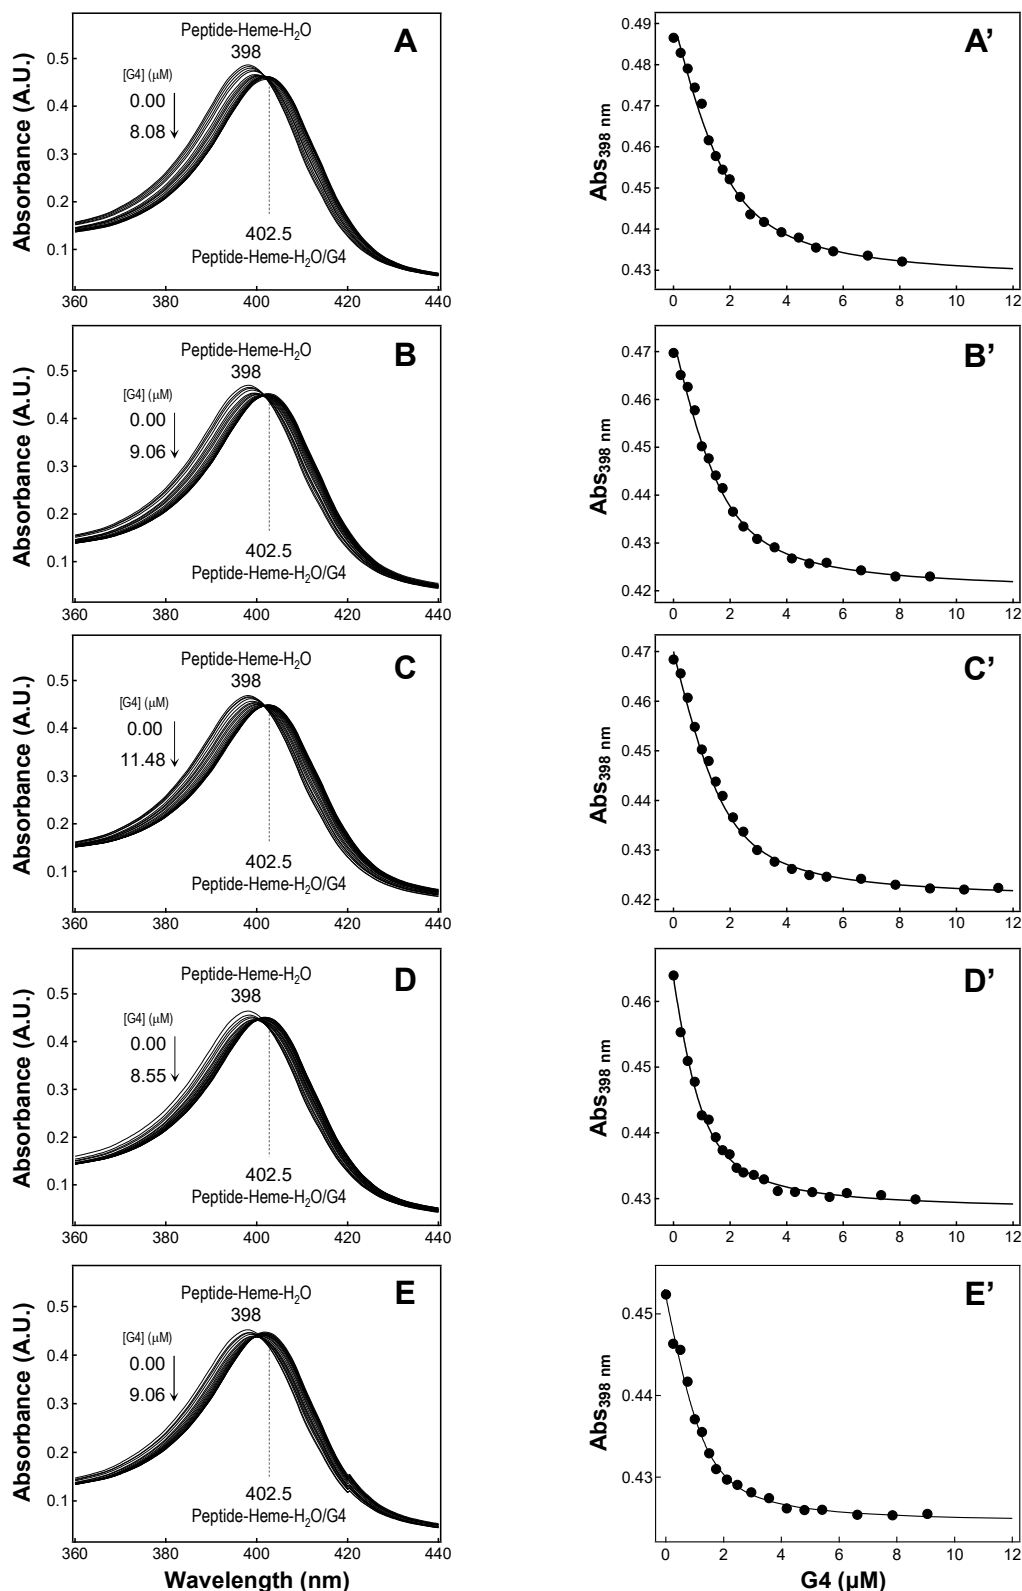

**Figure S13** (A-E) Absorption spectra (360–440 nm) of Peptide-Heme(Fe<sup>3+</sup>)-H<sub>2</sub>O in the presence of various concentrations of [d(TTAGGG)]<sub>4</sub>, in 300 mM KCl and 500 mM Tris-HCl buffer (pH 8.50 at 15–35 °C) containing 0.08 w/v% TritonX-100 and 0.5 v/v% dimethyl sulfoxide. (A'-E') A plot of the 398 nm absorbance against [d(TTAGGG)]<sub>4</sub> concentration. (A and A') 15 °C, [Peptide-Heme] = 3.7 μM; (B and B') 20 °C, [Peptide-Heme] = 3.6 μM; (C and C') 25 °C, [Peptide-Heme] = 3.6 μM; (D and D') 30 °C, [Peptide-Heme] = 3.6 μM; (E and E') 35 °C, [Peptide-Heme] = 3.5 μM.



**Table S4** The binding constant ( $K_a$ ) for complexation reaction.

| Temperature<br>(°C) | $K_a$ ( $\mu\text{M}^{-1}$ )     |                                  |
|---------------------|----------------------------------|----------------------------------|
|                     | Peptide-Heme-H <sub>2</sub> O/G4 | Peptide-Heme-NH <sub>3</sub> /G4 |
| 15                  | 1.76 ± 0.16                      | 37.55 ± 4.86                     |
| 20                  | 2.20 ± 0.08                      | 49.57 ± 6.79                     |
| 25                  | 2.50 ± 0.14                      | 64.84 ± 5.32                     |
| 30                  | 3.15 ± 0.29                      | 93.89 ± 6.44                     |
| 35                  | 4.04 ± 0.10                      | 121.75 ± 3.00                    |

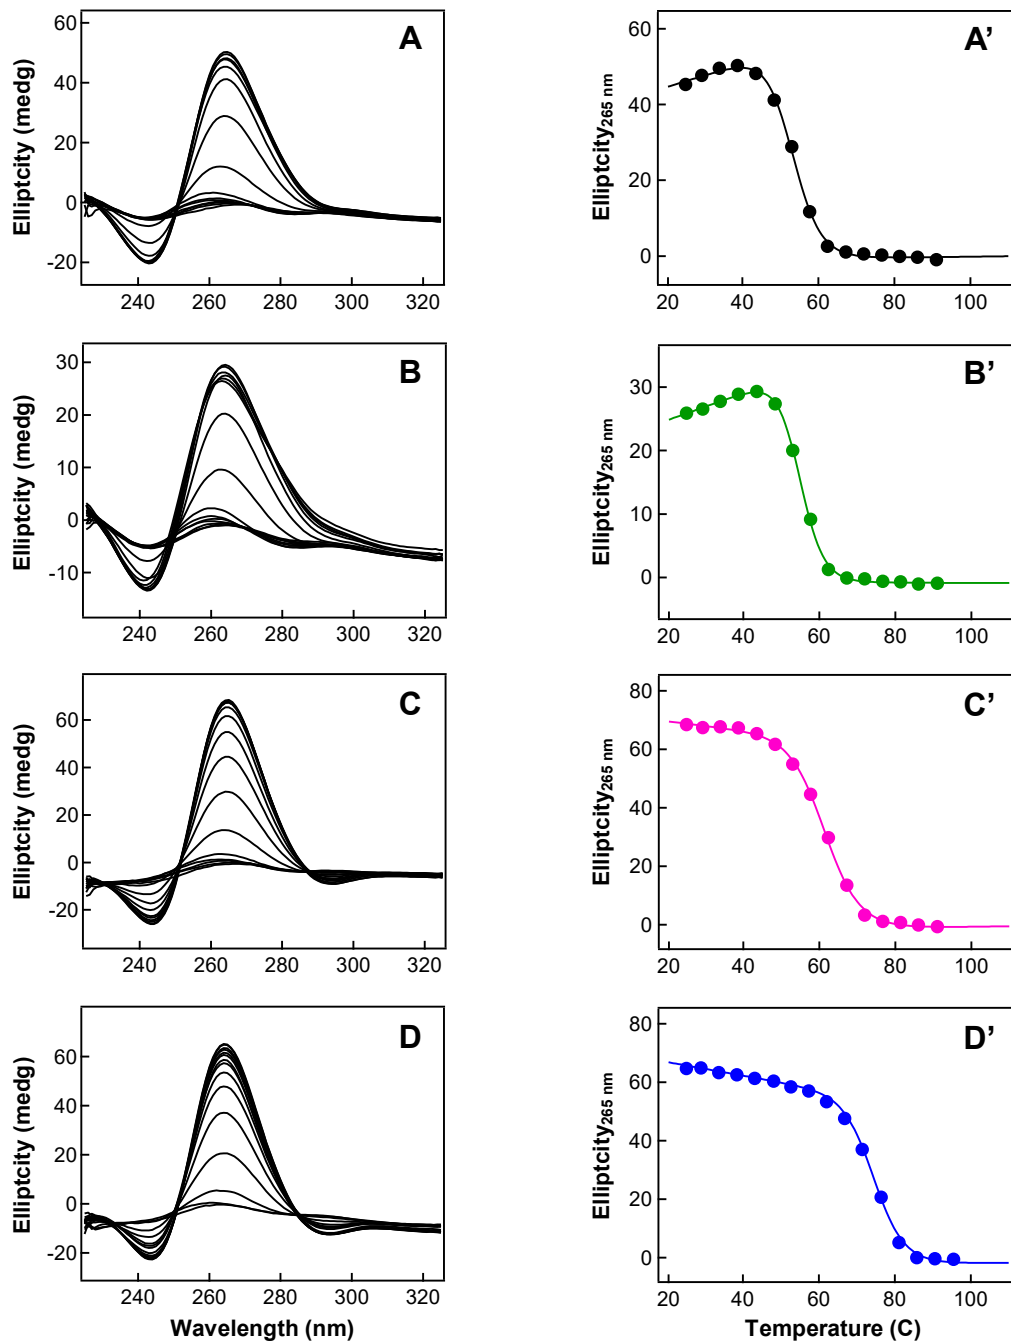

**Figure S14** Temperature dependent CD spectra of [d(TTAGGG)]<sub>4</sub> (A), [d(TTAGGG)]<sub>4</sub> + NH<sub>4</sub>Cl (B), [d(TTAGGG)]<sub>4</sub> + AcMP11 + H<sub>2</sub>O (C), and [d(TTAGGG)]<sub>4</sub> + AcMP11 + NH<sub>4</sub>Cl (D) in 100 mM KCl and 50 mM TAPS buffer (pH 8.50 at 25 °C). CD melting curve of [d(TTAGGG)]<sub>4</sub> (A'), [d(TTAGGG)]<sub>4</sub> + NH<sub>4</sub>Cl (B'), [d(TTAGGG)]<sub>4</sub> + AcMP11 + H<sub>2</sub>O (C'), and [d(TTAGGG)]<sub>4</sub> + AcMP11 + NH<sub>4</sub>Cl (D').

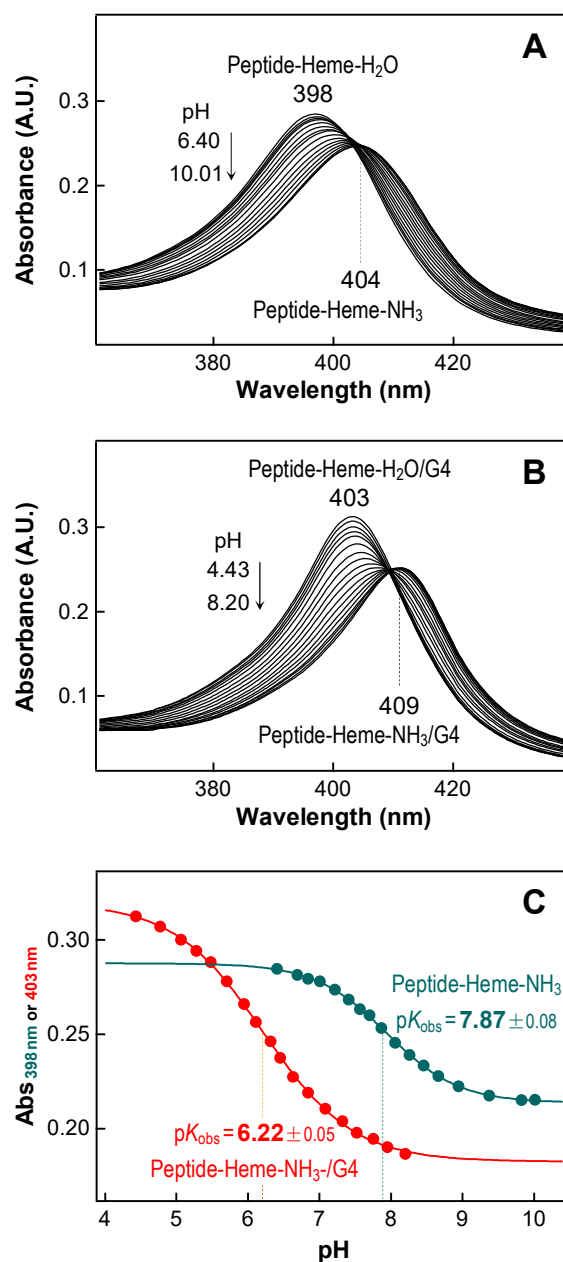

**Figure S15** (A) pH-dependent absorption spectra of oxidized Peptide-Heme( $\text{Fe}^{3+}$ )/G4 hybrid complex in 20 mM  $\text{NH}_4\text{Cl}$ , 300 mM  $\text{KCl}$ , 500 mM Tris-HCl buffer at 25 °C. (B) pH-dependent absorption spectra of oxidized Peptide-Heme( $\text{Fe}^{3+}$ ) in 20 mM  $\text{NH}_4\text{Cl}$ , 300 mM  $\text{KCl}$ , 500 mM Tris-HCl buffer at 25 °C. (C) Plots of the 398 or 403 nm absorbance of the oxidized Peptide-Heme( $\text{Fe}^{3+}$ )/G4 (red) and Peptide-Heme( $\text{Fe}^{3+}$ ) (black), respectively, against pH at 25 °C. For sample preparation of the Peptide-Heme( $\text{Fe}^{3+}$ )/G4 hybrid-complex, 400  $\mu\text{L}$  of 6  $\mu\text{M}$  Peptide-Heme( $\text{Fe}^{3+}$ ) was mixed with 400  $\mu\text{L}$  of 60  $\mu\text{M}$  [d(TTAGGG)]<sub>4</sub>.

**Table S5** The  $pK_a$  values of  $\text{NH}_4^+$  in aqueous solution at 15–35 °C.<sup>a</sup>

| Temperature (°C) | 15    | 20    | 25    | 30    | 35    |
|------------------|-------|-------|-------|-------|-------|
| $pK$             | 9.564 | 9.400 | 9.245 | 9.093 | 8.947 |

<sup>a</sup> Data taken from Speight JG. *Lange's Handbook of Chemistry*. 17<sup>th</sup> ed. McGraw-Hill Education, 2017.
